# Supplementary material for: Salvianolic Acid B improves cognitive impairment by inhibiting neuroinflammation and decreasing Aβ level in Porphyromonas gingivalis-infected mice
Source: publisher site journal article supplement (doi:10.18632/aging.103306), 2020-06-09
Supplement: Supplementary file [file aging-v12i11-103306-supplementary-material-SD1.pdf]

## SUPPLEMENTARY FIGURE

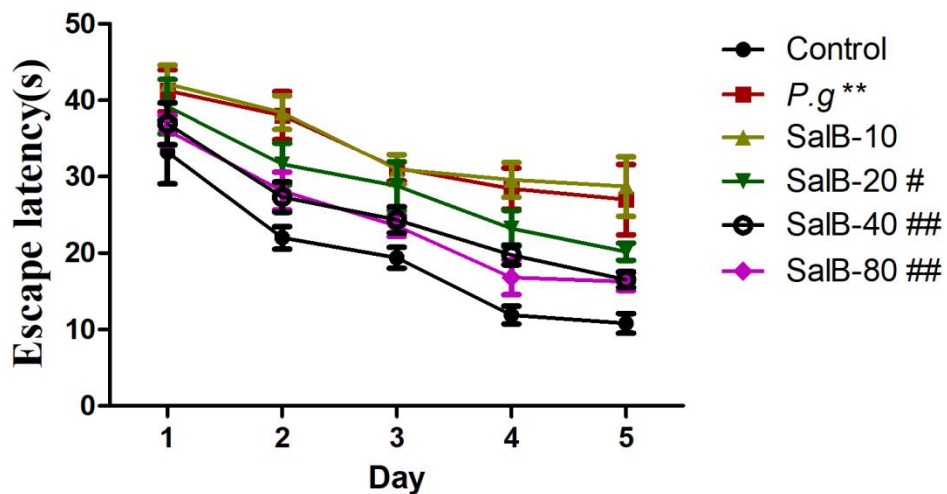

**Supplementary Figure 1. Different dosages of SalB protects against memory deficits in *P. gingivalis*-infected mice.** Escape latency of Morris water maze test. Experimental values were expressed as mean  $\pm$  SEM (n = 15 per group). \*\* P < 0.01 vs. Control; #P < 0.05, ##P < 0.01 vs. *P.g*.
